# Supplementary material for: Analysis of spike protein variants evolved in a novel in vivo long-term replication model for SARS-CoV-2
Source: PubMed Central journal article supplement (PMC10655031; doi:10.3389/fcimb.2023.1280686), 2023-11-03
Supplement: DataSheet_1.pdf [file DataSheet_1.pdf]

## *Supplementary Material*

**Supplementary Figure 1**  
**Supplementary Figure 2**  
**Supplementary Table 1**  
**Supplementary Table 2**  
**Supplementary Table 3**  
**Data Availability Statement**

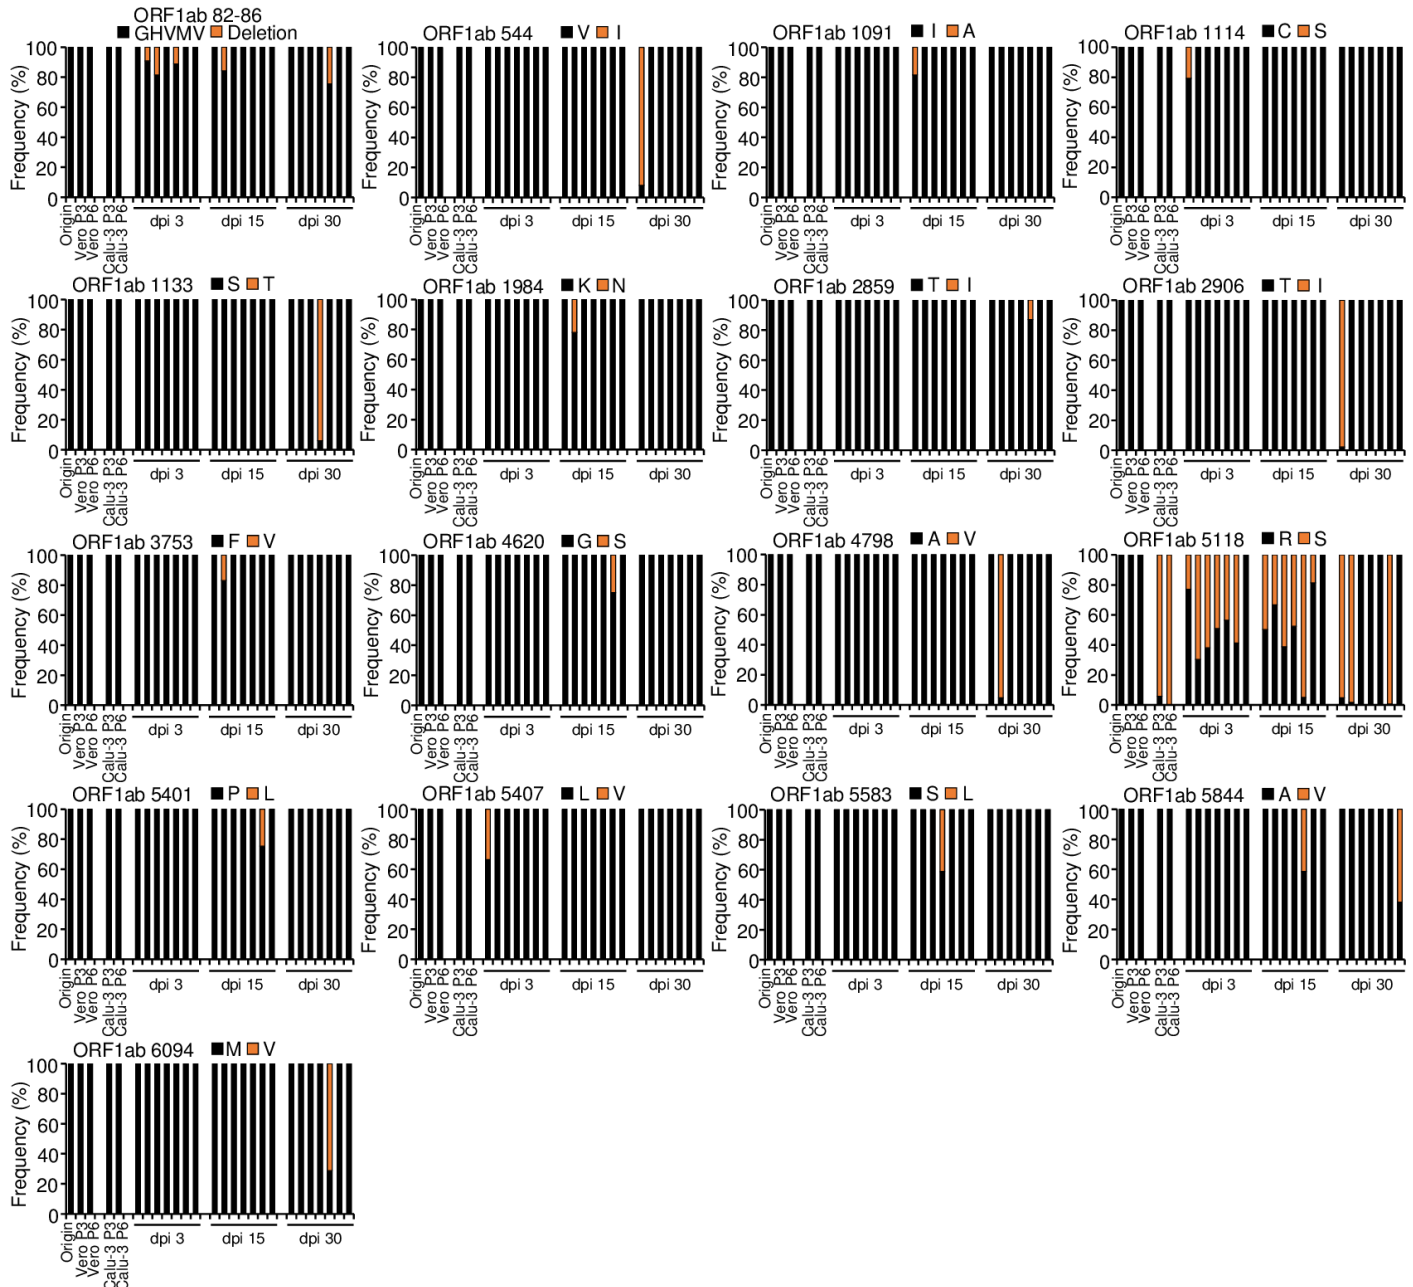

**Supplementary Figure 1.** Frequencies and substitutions of amino acid sequences in parental SARS-CoV-2 ORF1ab in cells during serial passage and in lung tumor tissues during long-term replication. Calu-3 cells were infected with 0.1 MOI of parental SARS-CoV-2 and then cultured serially 3 or 6 passage at three-day intervals. Calu-3 cells were subcutaneously implanted into the right flank of NRGa mice ( $n=7$  per group). After the tumor volume reached  $100 \text{ mm}^3$ , the tumors were inoculated with  $1 \times 10^6$  pfu of parental SARS-CoV-2. Whole-genome sequences of viruses in cell culture supernatants and supernatants of the tumor homogenates at 3, 15, and 30 dpi were analyzed. Each panel indicates the accumulation and substitutions of mutations at an amino acid position in parental SARS-CoV-2. Origin (parental): amino acid sequences of parental SARS-CoV-2 (Supplementary Table 1). Passage 3 (P3) and Passage 6 (P6): amino acid sequences in SARS-CoV-2 after culture in three and six passages, respectively, in Vero E6 cells (Vero) and Calu-3 cells. dpi, days post-infection.

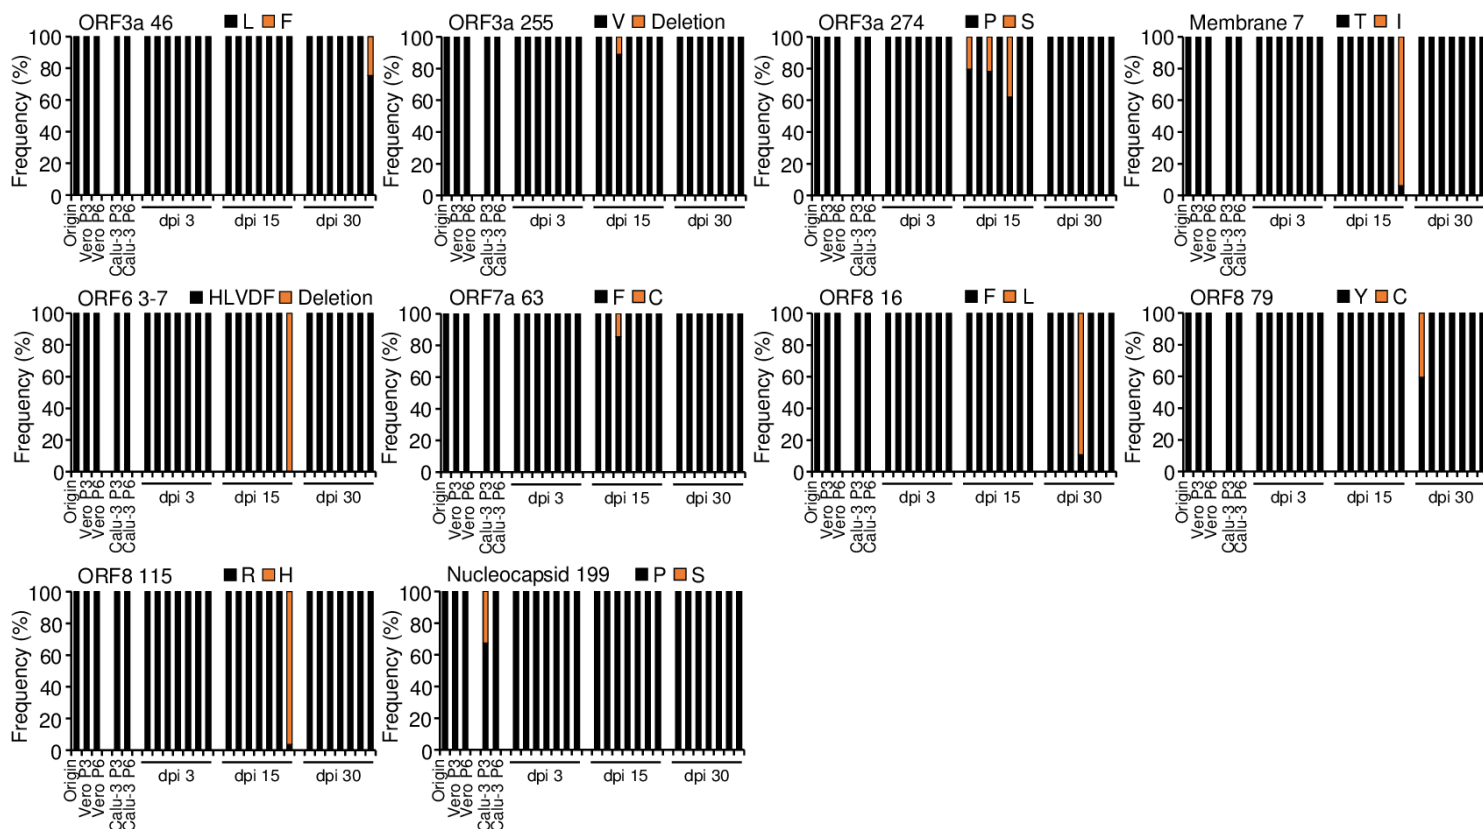

**Supplementary Figure 2.** Frequencies and substitutions of amino acid sequences in parental SARS-CoV-2 ORF3a, ORF7a, and ORF8 in cells during serial passage and in lung tumor tissues during long-term replication. Calu-3 cells were infected with 0.1 MOI of parental SARS-CoV-2 and then cultured serially 3 or 6 passage at three-day intervals. Calu-3 cells were subcutaneously implanted into the right flank of NRGa mice (n=7 per group). After the tumor volume reached 100 mm<sup>3</sup>, the tumors were inoculated with 1 × 10<sup>6</sup> pfu of parental SARS-CoV-2. Whole-genome sequences of viruses in cell culture supernatants and supernatants of the tumor homogenates at 3, 15, and 30 dpi were analyzed. Each panel indicates the accumulation and substitutions of mutations at an amino acid position in parental SARS-CoV-2. Origin (parental): amino acid sequences of parental SARS-CoV-2 (Supplementary Table 1). Passage 3 (P3) and Passage 6 (P6): amino acid sequences in SARS-CoV-2 after culture in three and six passages, respectively, in Vero E6 cells (Vero) and Calu-3 cells. dpi, days post-infection.

**Supplementary Table 1.** List of accession numbers for SARS-CoV-2 proteins based on GenBank: MW466791.1.

([https://www.ncbi.nlm.nih.gov/protein?LinkName=nucore\\_protein&from\\_uid=1955390757](https://www.ncbi.nlm.nih.gov/protein?LinkName=nucore_protein&from_uid=1955390757))

| Proteins     | Amino acid no. | Accession no. |
|--------------|----------------|---------------|
| ORF1ab       | 7096           | QQO75521.1    |
| ORF1a        | 4405           | QQO75522.1    |
| Spike        | 1273           | QQO75523.1    |
| ORF3a        | 275            | QQO75524.1    |
| Envelope     | 75             | QQO75525.1    |
| Membrane     | 222            | QQO75526.1    |
| ORF6         | 61             | QQO75527.1    |
| ORF7a        | 121            | QQO75528.1    |
| ORF7b        | 43             | QQO75529.1    |
| ORF8         | 121            | QQO75530.1    |
| Nucleocapsid | 419            | QQO75531.1    |
| ORF10        | 38             | QQO75532.1    |

**Supplementary Table 2.** Frequency of mutations in parental SARS-CoV-2 ORF1ab in cells during serial passage and in lung tumor tissues during long-term replication.

| ORF region       |    | ORF1ab              |              |              |              |            |            |      |              |      |            |              |              |              |              |              |              |              |
|------------------|----|---------------------|--------------|--------------|--------------|------------|------------|------|--------------|------|------------|--------------|--------------|--------------|--------------|--------------|--------------|--------------|
| Amino acid sites |    | 82-86               | 544          | 1091         | 1114         | 1133       | 1984       | 2859 | 2906         | 3753 | 4620       | 4798         | 5118         | 5401         | 5407         | 5583         | 5844         | 6094         |
| Origin           |    | GHVMV               | V            | I            | C            | S          | K          | T    | T            | F    | G          | A            | R            | P            | L            | S            | A            | M            |
| Vero P3          |    |                     |              |              |              |            |            |      |              |      |            |              |              |              |              |              |              |              |
| Vero P6          |    |                     |              |              |              |            |            |      |              |      |            |              |              |              |              |              |              |              |
| Calu-3 P3        |    |                     |              |              |              |            |            |      |              |      |            |              | S<br>(94.2%) |              |              |              |              |              |
| Calu-3 P6        |    |                     |              |              |              |            |            |      |              |      |            |              | S<br>(100%)  |              |              |              |              |              |
| dpi 3            | #1 |                     |              |              | S<br>(20.6%) |            |            |      |              |      |            |              | S<br>(23%)   |              | V<br>(33.7%) |              |              |              |
|                  | #2 | Deletion<br>(9.3%)  |              |              |              |            |            |      |              |      |            |              | S<br>(69.6%) |              |              |              |              |              |
|                  | #3 | Deletion<br>(18.6%) |              |              |              |            |            |      |              |      |            |              | S<br>(61.8%) |              |              |              |              |              |
|                  | #4 |                     |              |              |              |            |            |      |              |      |            |              | S<br>(49.1%) |              |              |              |              |              |
|                  | #5 | Deletion<br>(11.3%) |              |              |              |            |            |      |              |      |            |              | S<br>(43.5%) |              |              |              |              |              |
|                  | #6 |                     |              |              |              |            |            |      |              |      |            |              | S<br>(58.7%) |              |              |              |              |              |
|                  | #7 |                     |              |              |              |            |            |      |              |      |            |              |              |              |              |              |              |              |
| dpi 15           | #1 |                     |              | A<br>(18.5%) |              |            |            |      |              |      |            |              | S<br>(49.8%) |              |              |              |              |              |
|                  | #2 | Deletion<br>(15.7%) |              |              |              |            | N<br>(22%) |      |              |      |            | V<br>(17%)   | S<br>(33.2%) |              |              |              |              |              |
|                  | #3 |                     |              |              |              |            |            |      |              |      |            |              | S<br>(61.2%) |              |              |              |              |              |
|                  | #4 |                     |              |              |              |            |            |      |              |      |            |              | S<br>(47.6%) |              |              | L<br>(41.2%) |              |              |
|                  | #5 |                     |              |              |              |            |            |      |              |      |            |              | S<br>(94.9%) |              |              |              | V<br>(41.5%) |              |
|                  | #6 |                     |              |              |              |            |            |      |              |      |            |              | S<br>(18.7%) | L<br>(24.7%) |              |              |              |              |
|                  | #7 |                     |              |              |              |            |            |      |              |      | S<br>(25%) |              |              |              |              |              |              |              |
| dpi 30           | #1 |                     |              |              |              |            |            |      | I<br>(97.8%) |      |            |              | S<br>(95.2%) |              |              |              |              |              |
|                  | #2 |                     |              |              |              |            |            |      |              |      |            | V<br>(95.4%) | S<br>(98.2%) |              |              |              |              |              |
|                  | #3 |                     |              |              |              |            |            |      |              |      |            |              |              |              |              |              |              |              |
|                  | #4 |                     |              |              |              | T<br>(94%) |            |      |              |      |            |              |              |              |              |              |              |              |
|                  | #5 | Deletion<br>(24.4%) | I<br>(91.9%) |              |              |            |            |      | I<br>(13%)   |      |            |              |              |              |              |              |              | V<br>(71.2%) |
|                  | #6 |                     |              |              |              |            |            |      |              |      |            |              | S<br>(99.3%) |              |              |              |              |              |
|                  | #7 |                     |              |              |              |            |            |      |              |      |            |              |              |              |              |              | V<br>(61.8%) |              |

**Supplementary Table 3.** Frequency of mutations in parental SARS-CoV-2 in cells during serial passage and in lung tumor tissues during long-term replication (Spike, ORF3a, ORF7a, ORF8).

| ORF region       |    | Spike        |              |    |              |         |     |     |     |                            |              |              |     |              |              |              | ORF3a        |    |     | M   | ORF6         | ORF7a | ORF8 |    |    | N   |              |              |
|------------------|----|--------------|--------------|----|--------------|---------|-----|-----|-----|----------------------------|--------------|--------------|-----|--------------|--------------|--------------|--------------|----|-----|-----|--------------|-------|------|----|----|-----|--------------|--------------|
| Amino acid sites |    | 5            | 27           | 76 | 95           | 141-143 | 146 | 148 | 149 | 178                        | 180          | 185          | 215 | 484          | 655          | 685          | 1076         | 46 | 255 | 274 | 7            | 3-7   | 63   | 16 | 79 | 115 | 199          |              |
| Origin           |    | L            | A            | T  | T            | LGV     | H   | N   | N   | D                          | E            | N            | D   | E            | H            | R            | T            | L  | V   | P   | T            | HLVDF | F    | F  | Y  | R   | P            |              |
| Vero P3          |    |              |              |    | I<br>(72.5%) |         |     |     |     | N<br>(46.3%)<br>G<br>(27%) |              |              |     | K<br>(75.3%) | D<br>(22.8%) | Y<br>(21.7%) |              |    |     |     |              |       |      |    |    |     |              |              |
| Vero P6          |    |              |              |    | I<br>(54.4%) |         |     |     |     |                            |              |              |     | K<br>(57.3%) | D<br>(41.4%) | Y<br>(38.6%) | S<br>(52.4%) |    |     |     | A<br>(14.7%) |       |      |    |    |     |              |              |
| Calu-3 P3        |    |              |              |    | I<br>(95.3%) |         |     |     |     |                            |              |              |     | K<br>(99.9%) | D<br>(99.9%) | Y<br>(99.6%) |              |    |     |     |              |       |      |    |    |     | S<br>(32.7%) |              |
| Calu-3 P6        |    |              |              |    | I<br>(99.9%) |         |     |     |     |                            |              |              |     | K<br>(100%)  | D<br>(99.8%) | Y<br>(99.8%) |              |    |     |     |              |       |      |    |    |     |              |              |
| dpi 3            | #1 |              |              |    | I<br>(22.5%) |         |     |     |     |                            |              |              |     | K<br>(36.2%) | D<br>(100%)  | Y<br>(98.7%) |              |    |     |     |              |       |      |    |    |     |              |              |
|                  | #2 |              | V<br>(15.7%) |    | I<br>(60.9%) |         |     |     |     |                            |              |              |     | K<br>(71.3%) | D<br>(100%)  | Y<br>(100%)  |              |    |     |     |              |       |      |    |    |     |              |              |
|                  | #3 |              |              |    | I<br>(49.1%) |         |     |     |     |                            |              |              |     | K<br>(29.7%) | D<br>(65.2%) | Y<br>(97.4%) |              |    |     |     |              |       |      |    |    |     |              |              |
|                  | #4 |              |              |    | I<br>(46.7%) |         |     |     |     |                            |              |              |     | K<br>(45.3%) | D<br>(54.5%) | Y<br>(100%)  |              |    |     |     |              |       |      |    |    |     |              |              |
|                  | #5 |              |              |    | I<br>(50.7%) |         |     |     |     |                            |              |              |     | K<br>(37.1%) | D<br>(51.8%) | Y<br>(100%)  |              |    |     |     |              |       |      |    |    |     |              |              |
|                  | #6 |              |              |    | I<br>(58.3%) |         |     |     |     |                            |              |              |     | K<br>(23.4%) | D<br>(62.7%) | Y<br>(99.2%) |              |    |     |     |              |       |      |    |    |     |              |              |
|                  | #7 |              |              |    | I<br>(56.8%) |         |     |     |     |                            | N<br>(30.4%) | G<br>(20.8%) |     |              | K<br>(60.8%) | D<br>(27.9%) | Y<br>(22.1%) |    |     |     |              |       |      |    |    |     |              | S<br>(13.6%) |
| dpi 15           | #1 |              |              |    | I<br>(51.1%) |         |     |     |     |                            |              |              |     | K<br>(32.2%) | D<br>(100%)  | Y<br>(100%)  |              |    |     |     |              |       |      |    |    |     | S<br>(20.3%) |              |
|                  | #2 |              |              |    | I<br>(29%)   |         |     |     |     |                            |              |              |     | K<br>(37.3%) | D<br>(98.9%) | Y<br>(100%)  |              |    |     |     |              |       |      |    |    |     |              |              |
|                  | #3 |              |              |    | I<br>(55.6%) |         |     |     |     |                            |              |              |     | K<br>(70.6%) | D<br>(100%)  | Y<br>(88.1%) |              |    |     |     |              |       |      |    |    |     |              |              |
|                  | #4 |              | V<br>(38%)   |    | I<br>(47.4%) |         |     |     |     |                            |              |              |     | K<br>(47.5%) | D<br>(100%)  | Y<br>(100%)  |              |    |     |     |              |       |      |    |    |     |              |              |
|                  | #5 |              |              |    | I<br>(91.4%) |         |     |     |     |                            |              |              |     | K<br>(93.1%) | D<br>(100%)  | Y<br>(100%)  |              |    |     |     |              |       |      |    |    |     |              |              |
|                  | #6 |              |              |    | I<br>(17.8%) |         |     |     |     |                            | Q<br>(18.8%) |              |     | K<br>(64.2%) | D<br>(25.2%) | Y<br>(100%)  |              |    |     |     |              |       |      |    |    |     |              |              |
|                  | #7 |              |              |    | I<br>(17.8%) |         |     |     |     |                            |              |              |     | K<br>(96.9%) | D<br>(96.7%) | Y<br>(100%)  |              |    |     |     |              |       |      |    |    |     |              |              |
| dpi 30           | #1 | F<br>(91.8%) | V<br>(92.5%) |    | I<br>(100%)  |         |     |     |     |                            |              |              |     | K<br>(94.5%) | D<br>(100%)  | Y<br>(100%)  |              |    |     |     |              |       |      |    |    |     |              |              |
|                  | #2 |              |              |    | I<br>(98.5%) |         |     |     |     |                            |              |              |     | K<br>(98.1%) | D<br>(100%)  | Y<br>(100%)  |              |    |     |     |              |       |      |    |    |     |              |              |
|                  | #3 |              |              |    | I<br>(99%)   |         |     |     |     |                            |              |              |     | K<br>(99.4%) | D<br>(100%)  | Y<br>(99.9%) |              |    |     |     |              |       |      |    |    |     |              |              |
|                  | #4 |              |              |    | I<br>(10.9%) |         |     |     |     |                            |              |              |     | K<br>(14.6%) | D<br>(100%)  | Y<br>(100%)  |              |    |     |     |              |       |      |    |    |     |              |              |
|                  | #5 |              |              |    | I<br>(99%)   |         |     |     |     |                            |              |              |     | K<br>(99.4%) | D<br>(99.8%) | Y<br>(100%)  |              |    |     |     |              |       |      |    |    |     |              |              |
|                  | #6 |              | V<br>(22.1%) |    | I<br>(99.4%) |         |     |     |     |                            |              |              |     | K<br>(70%)   | D<br>(24.4%) | Y<br>(100%)  |              |    |     |     |              |       |      |    |    |     |              |              |
|                  | #7 |              |              |    | I<br>(27.7%) |         |     |     |     |                            |              |              |     |              | K<br>(70%)   | D<br>(24.4%) | Y<br>(100%)  |    |     |     |              |       |      |    |    |     |              |              |

## Data Availability Statement

All data needed to evaluate the conclusions in this manuscript have been included. The WGS data for the SARS-CoV-2 mutants analyzed in this study are available at the GISAID under the accession numbers: EPI\_ISL\_17375491, EPI\_ISL\_17375492, EPI\_ISL\_17375548, EPI\_ISL\_17375549, EPI\_ISL\_17375550, EPI\_ISL\_17375552, EPI\_ISL\_17375553, EPI\_ISL\_17375554, EPI\_ISL\_17375556, EPI\_ISL\_17375557, EPI\_ISL\_17375558, EPI\_ISL\_17375559, EPI\_ISL\_17375560, EPI\_ISL\_17375561, EPI\_ISL\_17375685, EPI\_ISL\_17375686, EPI\_ISL\_17375687, EPI\_ISL\_17375688, EPI\_ISL\_17375689, EPI\_ISL\_17375690, EPI\_ISL\_17375691, EPI\_ISL\_17375692, EPI\_ISL\_17375693, EPI\_ISL\_17375694, EPI\_ISL\_17375695, EPI\_ISL\_17375696, EPI\_ISL\_18065759, EPI\_ISL\_18065760.
